# Supplementary material for: Comparison of respiratory pathogen yields from Nasopharyngeal/Oropharyngeal swabs and sputum specimens collected from hospitalized adults in rural Western Kenya
Source: PubMed Central journal article supplement (PMC6677726; doi:10.1038/s41598-019-47713-4), 2019-08-02
Supplement: 41598_2019_47713_MOESM1_ESM.pdf [file 41598_2019_47713_MOESM1_ESM.pdf]

1  
2 **Comparison of respiratory pathogen yields from Nasopharyngeal/Oropharyngeal**  
3 **swabs and sputum specimens collected from hospitalized adults in rural Western**  
4 **Kenya**

5 Bryan O. Nyawanda<sup>1\*</sup>, Henry N. Njuguna<sup>2</sup>, Clayton O. Onyango<sup>3</sup>, Caroline Makokha<sup>1</sup>,  
6 Shirley Lidechi<sup>1</sup>, Barry Fields<sup>2</sup>, Jonas M. Winchell<sup>2</sup>, Jim S. Katieno<sup>1</sup>, Jeremiah Nyaundi<sup>1</sup>,  
7 Fredrick Ade<sup>1</sup>, Gideon Emukule<sup>4</sup>, Joshua A. Mott<sup>2</sup>, Nancy Otieno<sup>1</sup>, Marc-Alain  
8 Widdowson<sup>3</sup>, Sandra S. Chaves<sup>2,4</sup>

9  
10 <sup>1</sup> Kenya Medical Research Institute - Center for Global Health Research; <sup>2</sup> Centers for  
11 Disease Control and Prevention, Atlanta, GA, USA; <sup>3</sup> Division of Global Health Protection,  
12 Centers for Disease Control and Prevention, Kenya; <sup>4</sup> Influenza Program, Centers for  
13 Disease Control and Prevention, Kenya

14  
15 **\*Corresponding author:**

16 Email: oteebryan@gmail.com or bnyawanda@kemricdc.org

17 Phone: +254 -725-765138

18 Kenya Medical Research Institute - P.O BOX 1578 – 40100 Kisumu – Kenya

19 <https://orcid.org/0000-0003-0069-1473>

21  
22**Supplementary Table S1: Comparison of respiratory pathogen yields in nasopharyngeal/oropharyngeal vs sputum specimens among HIV+ and HIV- patients, March 2014 – July 2015**

| Pathogens                          | HIV Positive<br>n=115 |                 | p-value | HIV Negative<br>n=179 |                 | p-value |
|------------------------------------|-----------------------|-----------------|---------|-----------------------|-----------------|---------|
|                                    | NPOP<br>n (%)         | Sputum<br>n (%) |         | NPOP<br>n (%)         | Sputum<br>n (%) |         |
| Any pathogen                       | 84 (73)               | 70 (61)         | 0.03    | 116 (65)              | 100 (56)        | 0.07    |
| Any Bacterial pathogen             | 64 (56)               | 55 (48)         | 0.14    | 77 (43)               | 86 (48)         | 0.30    |
| Any Viral pathogen                 | 45 (39)               | 19 (17)         | <0.01   | 70 (39)               | 26 (15)         | <0.01   |
| <b>Bacterial pathogens</b>         |                       |                 |         |                       |                 |         |
| <i>Streptococcus pneumoniae</i>    | 36 (31)               | 27 (23)         | 0.05    | 40 (22)               | 34 (19)         | 0.29    |
| <i>Streptococcus pyogenes</i>      | 0                     | 1 (1)           |         | 1 (1)                 | 1 (1)           |         |
| <i>Haemophilus influenzae- All</i> | 25 (22)               | 16 (14)         | 0.04    | 30 (17)               | 31 (17)         | 1.00    |
| <i>Haemophilus influenzae B 1</i>  | 3 (3)                 | 1 (1)           | 0.50    | 1 (1)                 | 2 (1)           | 1.00    |
| <i>Haemophilus influenzae B 2</i>  | 1 (1)                 | 2 (2)           | 1.00    | 2 (1)                 | 2 (1)           |         |
| <i>Staphylococcus aureus</i>       | 21 (18)               | 12 (10)         | 0.06    | 20 (11)               | 16 (9)          | 0.56    |
| <i>Pseudomonas aeruginosa</i>      | 11 (10)               | 6 (5)           | 0.30    | 7 (4)                 | 13 (7)          | 0.21    |
| <i>Legionella spp.</i>             | 0                     | 0               |         | 0                     | 0               |         |
| <i>Klebsiella pneumoniae</i>       | 5 (4)                 | 11 (10)         | 0.15    | 8 (4)                 | 16 (9)          | 0.08    |
| <i>Bordetella pertussis</i>        | 0                     | 0               |         | 0                     | 0               |         |
| <i>Mycoplasma pneumoniae</i>       | 1 (1)                 | 0               |         | 0                     | 0               |         |
| <i>Chlamydia pneumoniae</i>        | 0                     | 0               |         | 1 (1)                 | 0               |         |
| <i>Moraxella catarrhalis</i>       | 16 (14)               | 10 (9)          | 0.07    | 19 (11)               | 12 (7)          | 0.12    |
| <b>Viral pathogens</b>             |                       |                 |         |                       |                 |         |
| Influenza A                        | 1 (1)                 | 2 (2)           | 0.99    | 11 (6)                | 6 (3)           | 0.06    |
| Influenza B                        | 2 (2)                 | 2 (2)           | 1.00    | 1 (1)                 | 2 (1)           | 0.99    |
| Para-influenza 1                   | 0                     | 0               |         | 1 (1)                 | 0               |         |
| Para-influenza 2                   | 4 (3)                 | 1 (1)           | 0.25    | 1 (1)                 | 0               |         |
| Para-influenza 3                   | 1 (1)                 | 0               |         | 4 (2)                 | 2 (1)           | 0.50    |
| Para-influenza 4                   | 0                     | 0               |         | 2 (1)                 | 0               |         |
| Resp. syncytial virus (RSV)        | 3 (3)                 | 0               |         | 8 (4)                 | 2 (1)           | 0.07    |
| Rhinovirus                         | 26 (23)               | 11 (10)         | <0.01   | 37 (21)               | 12 (7)          | <0.01   |
| Enterovirus                        | 4 (3)                 | 0               |         | 6 (3)                 | 0               |         |
| Human metapneumovirus              | 0                     | 0               |         | 5 (3)                 | 2 (1)           | 0.25    |
| Adenovirus                         | 1 (1)                 | 2 (2)           | 1.00    | 0                     | 2 (1)           |         |
| HCoV 1 (229E)                      | 0                     | 0               |         | 0                     | 0               |         |
| HCoV 2 (NL63)                      | 9 (8)                 | 1 (1)           | 0.01    | 0                     | 0               |         |
| HCoV 3 (OC43)                      | 3 (3)                 | 1 (1)           | 0.50    | 3 (2)                 | 0               |         |
| HCoV 4 (HKU1)                      | 0                     | 0               |         | 3 (2)                 | 0               |         |
| <b>Mycobacteria</b>                |                       |                 |         |                       |                 |         |
| <i>Mycobacterium tuberculosis</i>  | 1 (1)                 | 12 (10)         | <0.01   | 2 (1)                 | 4 (2)           | 0.63    |
| <b>Fungi</b>                       |                       |                 |         |                       |                 |         |
| <i>Pneumocystis jirovecii</i>      | 0                     | 0               |         | 0                     | 0               |         |

23  
24

25  
26  
27**Supplementary Table S2: Comparison of respiratory pathogen yields in nasopharyngeal/oropharyngeal vs sputum specimens among patients with and without malaria, March 2014 – July 2015**

| Pathogens                          | Malaria Positive<br>n=57 |                 | p-value | Malaria Negative<br>n=237 |                 | p-value |
|------------------------------------|--------------------------|-----------------|---------|---------------------------|-----------------|---------|
|                                    | NPOP<br>n (%)            | Sputum<br>n (%) |         | NPOP<br>n (%)             | Sputum<br>n (%) |         |
| Any pathogen                       | 38 (67)                  | 27 (47)         | 0.03    | 162 (68)                  | 143 (60)        | 0.04    |
| Any Bacterial pathogen             | 23 (40)                  | 22 (39)         | 1.00    | 118 (50)                  | 119 (50)        | 1.00    |
| Any Viral pathogen                 | 23 (40)                  | 10 (18)         | <0.01   | 92 (39)                   | 35 (15)         | <0.01   |
| <b>Bacterial pathogens</b>         |                          |                 |         |                           |                 |         |
| <i>Streptococcus pneumoniae</i>    | 12 (21)                  | 6 (11)          | 0.03    | 64 (27)                   | 55 (23)         | 0.16    |
| <i>Streptococcus pyogenes</i>      | 0                        | 1 (2)           |         | 1 (0)                     | 1 (0)           |         |
| <i>Haemophilus influenzae- All</i> | 7 (12)                   | 6 (11)          | 1.00    | 48 (20)                   | 41 (17)         | 0.30    |
| <i>Haemophilus influenzae B 1</i>  | 0                        | 0               |         | 4 (2)                     | 3 (1)           | 1.00    |
| <i>Haemophilus influenzae B 2</i>  | 0                        | 0               |         | 3 (1)                     | 4 (2)           | 1.00    |
| <i>Staphylococcus aureus</i>       | 7 (12)                   | 3 (5)           | 0.29    | 34 (14)                   | 25 (11)         | 0.19    |
| <i>Pseudomonas aeruginosa</i>      | 1 (2)                    | 7 (12)          | 0.03    | 17 (7)                    | 12 (5)          | 0.42    |
| <i>Legionella spp.</i>             | 0                        | 0               |         | 0                         | 0               |         |
| <i>Klebsiella pneumoniae</i>       | 2 (4)                    | 4 (7)           | 0.69    | 11 (5)                    | 23 (10)         | 0.02    |
| <i>Bordetella pertussis</i>        | 0                        | 0               |         | 0                         | 0               |         |
| <i>Mycoplasma pneumoniae</i>       | 0                        | 0               |         | 1 (0)                     | 0               |         |
| <i>Chlamydia pneumoniae</i>        | 0                        | 0               |         | 1 (0)                     | 0               |         |
| <i>Moraxella catarrhalis</i>       | 4 (7)                    | 1 (2)           | 0.25    | 31 (13)                   | 21 (9)          | 0.04    |
| <b>Viral pathogens</b>             |                          |                 |         |                           |                 |         |
| Influenza A                        | 3 (5)                    | 2 (4)           | 1.00    | 9 (4)                     | 5 (2)           | 0.22    |
| Influenza B                        | 0                        | 0               |         | 3 (1)                     | 4 (2)           | 1.00    |
| Para-influenza 1                   | 1 (2)                    | 0               |         | 0                         | 0               |         |
| Para-influenza 2                   | 0                        | 0               |         | 5 (2)                     | 1 (0)           | 0.13    |
| Para-influenza 3                   | 0                        | 0               |         | 5 (2)                     | 2 (1)           | 0.25    |
| Para-influenza 4                   | 0                        | 0               |         | 2 (1)                     | 0               |         |
| Resp. syncytial virus (RSV)        | 2 (4)                    | 1 (2)           | 1.00    | 9 (4)                     | 1 (0)           | 0.02    |
| Rhinovirus                         | 14 (25)                  | 5 (9)           | <0.01   | 49 (21)                   | 18 (8)          | <0.01   |
| Enterovirus                        | 3 (5)                    | 0               |         | 7 (3)                     | 0               |         |
| Human metapneumovirus              | 0                        | 0               |         | 5 (2)                     | 2 (1)           | 0.25    |
| Adenovirus                         | 0                        | 1 (2)           |         | 1 (0)                     | 3 (1)           | 0.63    |
| HCoV 1 (229E)                      | 0                        | 0               |         | 0                         | 0               |         |
| HCoV 2 (NL63)                      | 1 (2)                    | 0               |         | 8 (3)                     | 1 (0)           | 0.02    |
| HCoV 3 (OC43)                      | 2 (4)                    | 1 (2)           | 1.00    | 4 (2)                     | 0               |         |
| HCoV 4 (HKU1)                      | 0                        | 0               |         | 3 (1)                     | 0               |         |
| <b>Mycobacteria</b>                |                          |                 |         |                           |                 |         |
| <i>Mycobacterium tuberculosis</i>  | 0                        | 1 (2)           |         | 3 (1)                     | 15 (6)          | <0.01   |
| <b>Fungi</b>                       |                          |                 |         |                           |                 |         |
| <i>Pneumocystis jirovecii</i>      | 0                        | 0               |         | 0                         | 0               |         |

28

29  
30**Supplementary Table S3. Comparison of respiratory pathogen yields in nasopharyngeal/oropharyngeal vs sputum specimens by disease severity\*, March 2014 – July 2015**

| Pathogens                          | Severe<br>n=88 |                 | p-value | Non-severe<br>n=206 |                 | p-value |
|------------------------------------|----------------|-----------------|---------|---------------------|-----------------|---------|
|                                    | NPOP<br>n (%)  | Sputum<br>n (%) |         | NPOP<br>n (%)       | Sputum<br>n (%) |         |
| Any pathogen                       | 55 (63)        | 60 (68)         | 0.44    | 145 (70)            | 110 (53)        | <0.01   |
| Any Bacterial pathogen             | 43 (49)        | 48 (55)         | 0.47    | 98 (48)             | 93 (45)         | 0.60    |
| Any Viral pathogen                 | 24 (27)        | 13 (15)         | 0.01    | 91 (44)             | 32 (16)         | <0.01   |
| <b>Bacterial pathogens</b>         |                |                 |         |                     |                 |         |
| <i>Streptococcus pneumoniae</i>    | 24 (27)        | 20 (23)         | 0.34    | 52 (25)             | 41 (20)         | 0.06    |
| <i>Streptococcus pyogenes</i>      | 0              | 1 (1)           |         | 1 (1)               | 1 (1)           | 1.00    |
| <i>Haemophilus influenzae- All</i> | 17 (19)        | 13 (15)         | 0.39    | 38 (18)             | 34 (17)         | 0.57    |
| <i>Haemophilus influenzae B 1</i>  | 2 (2)          | 2 (2)           |         | 2 (1)               | 1 (0)           | 1.00    |
| <i>Haemophilus influenzae B 2</i>  | 2 (2)          | 3 (3)           | 1.00    | 1 (0)               | 1 (0)           |         |
| <i>Staphylococcus aureus</i>       | 12 (14)        | 10 (11)         | 0.80    | 29 (14)             | 18 (9)          | 0.06    |
| <i>Pseudomonas aeruginosa</i>      | 5 (6)          | 6 (7)           | 1.00    | 13 (6)              | 13 (6)          | 1.00    |
| <i>Legionella spp.</i>             | 0              | 0               |         | 0                   | 0               |         |
| <i>Klebsiella pneumoniae</i>       | 8 (9)          | 13 (15)         | 0.30    | 5 (2)               | 14 (7)          | 0.02    |
| <i>Bordetella pertussis</i>        | 0              | 0               |         | 0                   | 0               |         |
| <i>Mycoplasma pneumoniae</i>       | 0              | 0               |         | 1 (1)               | 0               |         |
| <i>Chlamydia pneumoniae</i>        | 1 (1)          | 0               |         | 0                   | 0               |         |
| <i>Moraxella catarrhalis</i>       | 12 (14)        | 10 (11)         | 0.69    | 23 (11)             | 12 (6)          | 0.01    |
| <b>Viral pathogens</b>             |                |                 |         |                     |                 |         |
| Influenza A                        | 3 (3)          | 1 (1)           | 0.50    | 9 (4)               | 6 (3)           | 0.38    |
| Influenza B                        | 1 (1)          | 1 (1)           |         | 2 (1)               | 3 (1)           | 1.00    |
| Para-influenza 1                   | 0              | 0               |         | 1 (1)               | 0               |         |
| Para-influenza 2                   | 3 (3)          | 0               |         | 2 (1)               | 1 (1)           | 1.00    |
| Para-influenza 3                   | 1 (1)          | 1 (1)           |         | 4 (2)               | 1 (1)           | 0.25    |
| Para-influenza 4                   | 0              | 0               |         | 2 (1)               | 0               |         |
| Resp. syncytial virus (RSV)        | 3 (3)          | 1 (1)           | 0.50    | 8 (4)               | 1 (1)           | 0.04    |
| Rhinovirus                         | 10 (11)        | 7 (8)           | 0.45    | 53 (26)             | 16 (8)          | <0.01   |
| Enterovirus                        | 2 (2)          | 0               |         | 8 (4)               | 0               |         |
| Human metapneumovirus              | 0              | 0               |         | 5 (2)               | 2 (1)           | 0.25    |
| Adenovirus                         | 1 (1)          | 2 (2)           | 1.00    | 0                   | 2 (1)           |         |
| HCoV 1 (229E)                      | 0              | 0               |         | 0                   | 0               |         |
| HCoV 2 (NL63)                      | 3 (3)          | 1 (1)           | 0.50    | 6 (3)               | 0               |         |
| HCoV 3 (OC43)                      | 0              | 0               |         | 6 (3)               | 1 (1)           | 0.06    |
| HCoV 4 (HKU1)                      | 1 (1)          | 0               |         | 2 (1)               | 0               |         |
| <b>Mycobacteria</b>                |                |                 |         |                     |                 |         |
| <i>Mycobacterium tuberculosis</i>  | 1(1)           | 10 (11)         | 0.01    | 2 (1)               | 6 (3)           | 0.13    |
| <b>Fungi</b>                       |                |                 |         |                     |                 |         |
| <i>Pneumocystis jirovecii</i>      | 0              | 0               |         | 0                   | 0               |         |

31  
32

\*Disease severity assessed by prolonged hospitalization (severe = >7 days in hospital; non-severe = ≤7 days in hospital).

33  
34**Supplementary Table S4. Comparison of respiratory pathogen yields in nasopharyngeal/oropharyngeal vs sputum specimens by duration of illness\*, March 2014 – July 2015**

| Pathogens                          | Acute illness<br>n=116 |                 | p-value | Non-acute illness<br>n=178 |                 | p-value |
|------------------------------------|------------------------|-----------------|---------|----------------------------|-----------------|---------|
|                                    | NPOP<br>n (%)          | Sputum<br>n (%) |         | NPOP<br>n (%)              | Sputum<br>n (%) |         |
| Any pathogen                       | 80 (69)                | 65 (56)         | 0.02    | 120 (67)                   | 105 (59)        | 0.08    |
| Any Bacterial pathogen             | 53 (46)                | 53 (46)         | 1.00    | 88 (49)                    | 88 (49)         | 1.00    |
| Any Viral pathogen                 | 48 (41)                | 21 (18)         | <0.01   | 67 (38)                    | 24 (13)         | <0.01   |
| <b>Bacterial pathogens</b>         |                        |                 |         |                            |                 |         |
| <i>Streptococcus pneumoniae</i>    | 28 (24)                | 25 (22)         | 0.61    | 48 (27)                    | 36 (20)         | 0.02    |
| <i>Streptococcus pyogenes</i>      | 1 (1)                  | 1 (1)           |         | 0                          | 1 (1)           |         |
| <i>Haemophilus influenzae- All</i> | 20 (17)                | 20 (17)         | 1.00    | 35 (20)                    | 27 (15)         | 0.13    |
| <i>Haemophilus influenzae B 1</i>  | 0                      | 1 (1)           |         | 4 (2)                      | 2 (1)           | 0.50    |
| <i>Haemophilus influenzae B 2</i>  | 0                      | 1(1)            |         | 3 (2)                      | 3 (2)           |         |
| <i>Staphylococcus aureus</i>       | 17 (15)                | 9 (8)           | 0.12    | 24 (13)                    | 19 (11)         | 0.42    |
| <i>Pseudomonas aeruginosa</i>      | 6 (5)                  | 8 (7)           | 0.75    | 12 (7)                     | 11 (6)          | 1.00    |
| <i>Legionella spp.</i>             | 0                      | 0               |         | 0                          | 0               |         |
| <i>Klebsiella pneumoniae</i>       | 7 (6)                  | 8 (7)           | 1.00    | 6 (3)                      | 19 (11)         | 0.01    |
| <i>Bordetella pertussis</i>        | 0                      | 0               |         | 0                          | 0               |         |
| <i>Mycoplasma pneumoniae</i>       | 1 (1)                  | 0               |         | 0                          | 0               |         |
| <i>Chlamydia pneumoniae</i>        | 1 (1)                  | 0               |         | 0                          | 0               |         |
| <i>Moraxella catarrhalis</i>       | 13 (11)                | 9 (8)           | 0.29    | 22 (12)                    | 13 (7)          | 0.04    |
| <b>Viral pathogens</b>             |                        |                 |         |                            |                 |         |
| Influenza A                        | 6 (5)                  | 4 (3)           | 0.50    | 6 (3)                      | 3 (2)           | 0.38    |
| Influenza B                        | 0                      | 0               |         | 3 (2)                      | 4 (2)           | 1.00    |
| Para-influenza 1                   | 1 (1)                  | 0               |         | 0                          | 0               |         |
| Para-influenza 2                   | 1 (1)                  | 1 (1)           |         | 4 (2)                      | 0               |         |
| Para-influenza 3                   | 2 (2)                  | 1 (1)           | 1.00    | 3 (2)                      | 1 (1)           | 0.50    |
| Para-influenza 4                   | 1 (1)                  | 0               |         | 1 (1)                      | 0               |         |
| Resp. syncytial virus (RSV)        | 2 (2)                  | 0               |         | 9 (5)                      | 2 (1)           | 0.04    |
| Rhinovirus                         | 32 (28)                | 12 (10)         | <0.01   | 31 (17)                    | 11 (6)          | <0.01   |
| Enterovirus                        | 4 (3)                  | 0               |         | 6 (3)                      | 0               |         |
| Human metapneumovirus              | 3 (3)                  | 2 (2)           | 1.00    | 2 (1)                      | 0               |         |
| Adenovirus                         | 0                      | 2 (2)           |         | 1 (1)                      | 2 (1)           | 1.00    |
| HCoV 1 (229E)                      | 0                      | 0               |         | 0                          | 0               |         |
| HCoV 2 (NL63)                      | 1 (1)                  | 0               |         | 8 (4)                      | 1 (1)           | 0.02    |
| HCoV 3 (OC43)                      | 1 (1)                  | 0               |         | 5 (3)                      | 1 (1)           | 0.13    |
| HCoV 4 (HKU1)                      | 1 (1)                  | 0               |         | 2 (1)                      | 0               |         |
| <b>Mycobacteria</b>                |                        |                 |         |                            |                 |         |
| <i>Mycobacterium tuberculosis</i>  | 2 (2)                  | 4 (3)           | 0.63    | 1 (1)                      | 12 (7)          | <0.01   |
| <b>Fungi</b>                       |                        |                 |         |                            |                 |         |
| <i>Pneumocystis jirovecii</i>      | 0                      | 0               |         | 0                          | 0               |         |

35  
36

\*Duration of illness measured by time from illness onset to hospital admission (acute illness= <5 days; non-acute illness= ≥5 days)

37 **Supplementary Table S5. Co-detection of respiratory pathogens from nasopharyngeal/ oropharyngeal swabs**

| Pathogens                          | Code  | Bacterial pathogens |      |      |       |       |      |      |      |      |      |      |      |      |      | Viral pathogens |      |      |      |      |      |      |      |      |      |      |      | mytb | pnji |      |      |
|------------------------------------|-------|---------------------|------|------|-------|-------|------|------|------|------|------|------|------|------|------|-----------------|------|------|------|------|------|------|------|------|------|------|------|------|------|------|------|
|                                    |       | stpn                | gast | hiat | hitb1 | hitb2 | stau | psae | lspp | klpn | bop1 | mypn | chpn | moca | FluA | FluB            | piv1 | piv2 | piv3 | piv4 | resv | rhiv | entv | hmpv | aden | hev1 | hev2 |      |      | hev3 | hev4 |
| <b>Bacterial pathogens</b>         |       |                     |      |      |       |       |      |      |      |      |      |      |      |      |      |                 |      |      |      |      |      |      |      |      |      |      |      |      |      |      |      |
| <i>Streptococcus pneumoniae</i>    | stpn  | 76                  |      |      |       |       |      |      |      |      |      |      |      |      |      |                 |      |      |      |      |      |      |      |      |      |      |      |      |      |      |      |
| <i>Streptococcus pyogenes</i>      | gast  | 1                   | 1    |      |       |       |      |      |      |      |      |      |      |      |      |                 |      |      |      |      |      |      |      |      |      |      |      |      |      |      |      |
| <i>Haemophilus influenzae- All</i> | hiat  | 29                  | 1    | 55   |       |       |      |      |      |      |      |      |      |      |      |                 |      |      |      |      |      |      |      |      |      |      |      |      |      |      |      |
| <i>Haemophilus influenzae B 1</i>  | hitb1 | 2                   | 0    | 3    | 4     |       |      |      |      |      |      |      |      |      |      |                 |      |      |      |      |      |      |      |      |      |      |      |      |      |      |      |
| <i>Haemophilus influenzae B 2</i>  | hitb2 | 0                   | 0    | 2    | 1     | 3     |      |      |      |      |      |      |      |      |      |                 |      |      |      |      |      |      |      |      |      |      |      |      |      |      |      |
| <i>Staphylococcus aureus</i>       | stau  | 12                  | 0    | 10   | 0     | 0     | 41   |      |      |      |      |      |      |      |      |                 |      |      |      |      |      |      |      |      |      |      |      |      |      |      |      |
| <i>Pseudomonas aeruginosa</i>      | psae  | 8                   | 0    | 4    | 0     | 0     | 4    | 18   |      |      |      |      |      |      |      |                 |      |      |      |      |      |      |      |      |      |      |      |      |      |      |      |
| <i>Legionella spp.</i>             | lspp  | 0                   | 0    | 0    | 0     | 0     | 0    | 0    | 0    |      |      |      |      |      |      |                 |      |      |      |      |      |      |      |      |      |      |      |      |      |      |      |
| <i>Klebsiella pneumoniae</i>       | klpn  | 6                   | 0    | 4    | 0     | 0     | 3    | 1    | 0    | 13   |      |      |      |      |      |                 |      |      |      |      |      |      |      |      |      |      |      |      |      |      |      |
| <i>Bordetella pertussis</i>        | bop1  | 0                   | 0    | 0    | 0     | 0     | 0    | 0    | 0    | 0    | 0    |      |      |      |      |                 |      |      |      |      |      |      |      |      |      |      |      |      |      |      |      |
| <i>Mycoplasma pneumoniae</i>       | mypn  | 0                   | 0    | 0    | 0     | 0     | 1    | 1    | 0    | 0    | 0    | 1    |      |      |      |                 |      |      |      |      |      |      |      |      |      |      |      |      |      |      |      |
| <i>Chlamydia pneumoniae</i>        | chpn  | 0                   | 0    | 0    | 0     | 0     | 1    | 0    | 0    | 0    | 0    | 0    | 1    |      |      |                 |      |      |      |      |      |      |      |      |      |      |      |      |      |      |      |
| <i>Moraxella catarrhalis</i>       | moca  | 19                  | 0    | 18   | 2     | 0     | 5    | 3    | 0    | 3    | 0    | 0    | 1    | 35   |      |                 |      |      |      |      |      |      |      |      |      |      |      |      |      |      |      |
| <b>Viral pathogens</b>             |       |                     |      |      |       |       |      |      |      |      |      |      |      |      |      |                 |      |      |      |      |      |      |      |      |      |      |      |      |      |      |      |
| Influenza A                        | FluA  | 4                   | 0    | 3    | 0     | 0     | 1    | 0    | 0    | 0    | 0    | 0    | 0    | 2    | 12   |                 |      |      |      |      |      |      |      |      |      |      |      |      |      |      |      |
| Influenza B                        | FluB  | 0                   | 0    | 0    | 0     | 0     | 0    | 0    | 0    | 0    | 0    | 0    | 0    | 0    | 3    |                 |      |      |      |      |      |      |      |      |      |      |      |      |      |      |      |
| Para-influenza 1                   | piv1  | 0                   | 0    | 1    | 0     | 0     | 0    | 0    | 0    | 1    | 0    | 0    | 0    | 0    | 0    | 1               |      |      |      |      |      |      |      |      |      |      |      |      |      |      |      |
| Para-influenza 2                   | piv2  | 2                   | 0    | 1    | 0     | 0     | 3    | 0    | 0    | 0    | 0    | 0    | 0    | 1    | 0    | 0               | 5    |      |      |      |      |      |      |      |      |      |      |      |      |      |      |
| Para-influenza 3                   | piv3  | 2                   | 0    | 3    | 0     | 1     | 0    | 1    | 0    | 0    | 0    | 0    | 0    | 0    | 0    | 0               | 5    |      |      |      |      |      |      |      |      |      |      |      |      |      |      |
| Para-influenza 4                   | piv4  | 1                   | 0    | 2    | 0     | 0     | 0    | 0    | 0    | 0    | 0    | 0    | 0    | 1    | 0    | 0               | 0    | 2    |      |      |      |      |      |      |      |      |      |      |      |      |      |
| Resp. syncytial virus (RSV)        | resv  | 4                   | 0    | 2    | 0     | 0     | 2    | 1    | 0    | 0    | 0    | 0    | 0    | 3    | 2    | 0               | 0    | 0    | 0    | 11   |      |      |      |      |      |      |      |      |      |      |      |
| Rhinovirus                         | rhiv  | 19                  | 0    | 19   | 1     | 1     | 11   | 2    | 0    | 2    | 0    | 0    | 7    | 0    | 0    | 0               | 2    | 1    | 0    | 63   |      |      |      |      |      |      |      |      |      |      |      |
| Enterovirus                        | entv  | 2                   | 0    | 1    | 0     | 0     | 0    | 1    | 0    | 0    | 0    | 1    | 0    | 0    | 0    | 0               | 0    | 1    | 0    | 0    | 6    | 10   |      |      |      |      |      |      |      |      |      |
| Human metapneumovirus              | hmpv  | 0                   | 0    | 2    | 0     | 0     | 1    | 0    | 0    | 1    | 0    | 0    | 0    | 2    | 0    | 0               | 0    | 0    | 0    | 0    | 2    | 0    | 5    |      |      |      |      |      |      |      |      |
| Adenovirus                         | aden  | 0                   | 0    | 0    | 0     | 0     | 0    | 0    | 0    | 0    | 0    | 0    | 0    | 0    | 0    | 0               | 0    | 0    | 0    | 0    | 0    | 0    | 0    | 1    |      |      |      |      |      |      |      |

|                                   |      |   |   |   |   |   |   |   |   |   |   |   |   |   |   |   |   |   |   |   |   |   |   |   |   |   |   |   |   |   |   |   |   |
|-----------------------------------|------|---|---|---|---|---|---|---|---|---|---|---|---|---|---|---|---|---|---|---|---|---|---|---|---|---|---|---|---|---|---|---|---|
| HCoV 1 (229E)                     | hcv1 | 0 | 0 | 0 | 0 | 0 | 0 | 0 | 0 | 0 | 0 | 0 | 0 | 0 | 0 | 0 | 0 | 0 | 0 | 0 | 0 | 0 | 0 | 0 | 0 | 0 |   |   |   |   |   |   |   |
| HCoV 2 (NL63)                     | hcv2 | 3 | 0 | 3 | 0 | 0 | 0 | 1 | 0 | 0 | 0 | 0 | 0 | 3 | 0 | 0 | 0 | 0 | 0 | 0 | 0 | 0 | 4 | 1 | 0 | 0 | 0 | 9 |   |   |   |   |   |
| HCoV 3 (OC43)                     | hcv3 | 2 | 0 | 1 | 0 | 0 | 1 | 1 | 0 | 0 | 0 | 0 | 0 | 0 | 0 | 0 | 0 | 0 | 0 | 0 | 0 | 0 | 1 | 0 | 1 | 0 | 0 | 0 | 6 |   |   |   |   |
| HCoV 4 (HKU1)                     | hcv4 | 1 | 0 | 1 | 0 | 0 | 0 | 0 | 0 | 0 | 0 | 0 | 0 | 1 | 0 | 0 | 0 | 0 | 0 | 0 | 0 | 1 | 0 | 0 | 0 | 0 | 0 | 0 | 3 |   |   |   |   |
| <b>Mycobacteria</b>               |      |   |   |   |   |   |   |   |   |   |   |   |   |   |   |   |   |   |   |   |   |   |   |   |   |   |   |   |   |   |   |   |   |
| <i>Mycobacterium tuberculosis</i> | mytb | 0 | 0 | 1 | 0 | 0 | 1 | 0 | 0 | 1 | 0 | 0 | 0 | 0 | 0 | 0 | 0 | 0 | 0 | 0 | 0 | 0 | 1 | 1 | 0 | 0 | 0 | 0 | 0 | 0 | 3 |   |   |
| <b>Fungi</b>                      |      |   |   |   |   |   |   |   |   |   |   |   |   |   |   |   |   |   |   |   |   |   |   |   |   |   |   |   |   |   |   |   |   |
| <i>Pneumocystis jirovecii</i>     | pnji | 0 | 0 | 0 | 0 | 0 | 0 | 0 | 0 | 0 | 0 | 0 | 0 | 0 | 0 | 0 | 0 | 0 | 0 | 0 | 0 | 0 | 0 | 0 | 0 | 0 | 0 | 0 | 0 | 0 | 0 | 0 | 0 |

38

39

40





|                                   |      |   |   |   |   |   |   |   |   |   |   |   |   |   |   |   |   |   |   |   |   |   |   |   |   |   |   |   |   |    |   |   |   |   |   |   |
|-----------------------------------|------|---|---|---|---|---|---|---|---|---|---|---|---|---|---|---|---|---|---|---|---|---|---|---|---|---|---|---|---|----|---|---|---|---|---|---|
| HCoV 1 (229E)                     | hcv1 | 0 | 0 | 0 | 0 | 0 | 0 | 0 | 0 | 0 | 0 | 0 | 0 | 0 | 0 | 0 | 0 | 0 | 0 | 0 | 0 | 0 | 0 | 0 | 0 | 0 |   |   |   |    |   |   |   |   |   |   |
| HCoV 2 (NL63)                     | hcv2 | 0 | 0 | 0 | 0 | 0 | 0 | 0 | 0 | 1 | 0 | 0 | 0 | 0 | 0 | 0 | 0 | 0 | 0 | 0 | 0 | 0 | 0 | 0 | 0 | 0 | 0 | 1 |   |    |   |   |   |   |   |   |
| HCoV 3 (OC43)                     | hcv3 | 0 | 0 | 0 | 0 | 0 | 0 | 1 | 0 | 0 | 0 | 0 | 0 | 0 | 0 | 0 | 0 | 0 | 0 | 0 | 0 | 0 | 0 | 0 | 0 | 0 | 0 | 1 |   |    |   |   |   |   |   |   |
| HCoV 4 (HKU1)                     | hcv4 | 0 | 0 | 0 | 0 | 0 | 0 | 0 | 0 | 0 | 0 | 0 | 0 | 0 | 0 | 0 | 0 | 0 | 0 | 0 | 0 | 0 | 0 | 0 | 0 | 0 | 0 | 0 | 0 | 0  | 0 | 0 | 0 | 0 | 0 |   |
| <b>Mycobacteria</b>               |      |   |   |   |   |   |   |   |   |   |   |   |   |   |   |   |   |   |   |   |   |   |   |   |   |   |   |   |   |    |   |   |   |   |   |   |
| <i>Mycobacterium tuberculosis</i> | mytb | 0 | 0 | 0 | 0 | 0 | 2 | 0 | 0 | 5 | 0 | 0 | 0 | 0 | 0 | 0 | 0 | 0 | 0 | 0 | 0 | 0 | 0 | 0 | 0 | 0 | 1 | 0 | 0 | 16 |   |   |   |   |   |   |
| <b>Fungi</b>                      |      |   |   |   |   |   |   |   |   |   |   |   |   |   |   |   |   |   |   |   |   |   |   |   |   |   |   |   |   |    |   |   |   |   |   |   |
| <i>Pneumocystis jirovecii</i>     | pnji | 0 | 0 | 0 | 0 | 0 | 0 | 0 | 0 | 0 | 0 | 0 | 0 | 0 | 0 | 0 | 0 | 0 | 0 | 0 | 0 | 0 | 0 | 0 | 0 | 0 | 0 | 0 | 0 | 0  | 0 | 0 | 0 | 0 | 0 | 0 |

42

43
